# Supplementary material for: Validation of 4 Estimating Methods to Evaluate 24-h Urinary Sodium Excretion: Summer and Winter Seasons for College Students in China
Source: Nutrients. 2022 Jun 30;14(13):2736. doi: 10.3390/nu14132736 (PMC9269089; doi:10.3390/nu14132736)
Supplement: Supplementary file 1 [file nutrients-14-02736-s001.zip › nutrients-1766075-supplementary.pdf]

**TableS1.** Predictive methods for 24-h sodium excretion based on single spot urinary sodium concentrations

| Method     | Urine sample                     | Predictive method for 24-h sodium excretion                                                                                                                                                                                                                                                                                                                                                                                                                                                                                                                                                                                                                                                     |
|------------|----------------------------------|-------------------------------------------------------------------------------------------------------------------------------------------------------------------------------------------------------------------------------------------------------------------------------------------------------------------------------------------------------------------------------------------------------------------------------------------------------------------------------------------------------------------------------------------------------------------------------------------------------------------------------------------------------------------------------------------------|
| Kawasaki   | The second morning urine sample1 | <p>Estimated sodium (mEq/day) = <math>16.3 \times [\text{spot Na (mEq/L)} / \text{spot Cr (mg/dL} \times 10) \times \text{Pr24 hCr (mg/day)}]^{0.500}</math></p> <p>Male: <math>\text{Pr24 hCr (mg/day)} = 15.12 \times \text{weight (kg)} + 7.39 \times \text{height (cm)} - 12.63 \times \text{age (years)} - 79.9</math></p> <p>Female: <math>\text{Pr24 hCr (mg/day)} = 8.58 \times \text{weight (kg)} + 5.09 \times \text{height (cm)} - 4.72 \times \text{age (years)} - 74.95</math></p>                                                                                                                                                                                                 |
| INTERSA LT | Spot urine sample                | <p>Male: <math>24\text{h Estimated sodium (mg/day)} = 23 \times [25.46 + 0.46 \times \text{spot Na (mmol/L)} - 2.75 \times \text{spot Cr (mmol/L)} - 0.13 \times \text{spot K (mmol/L)} + 4.10 \times \text{BMI (kg/m}^2) + 0.26 \times \text{age (years)}]</math></p> <p>Female: <math>24\text{h Estimated sodium (mg/day)} = 23 \times [5.07 + 0.34 \times \text{spot Na (mmol/L)} - 2.16 \times \text{spot Cr (mmol/L)} - 0.09 \times \text{spot K (mmol/L)} + 2.39 \times \text{BMI (kg/m}^2) + 2.35 \times \text{age (years)} - 0.03 \times \text{age (years)}^2]</math></p>                                                                                                               |
| Tanaka     | Spot urine sample                | <p><math>24\text{h Estimated sodium (mg/day)} = 23 \times 21.98 \times \{ \text{spot Na (mEq/L)} / [\text{spot Cr (mg/dL)} \times 10] \times \text{Pr24 hCr (mg/day)} \}^{0.392}</math></p> <p><math>\text{Pr24hCr (mg/day)} = 14.89 \times \text{weight (kg)} + 16.14 \times \text{height (cm)} - 2.04 \times \text{age (years)} - 2244.45</math></p>                                                                                                                                                                                                                                                                                                                                          |
| Sun's      | Afternoon spot urine sample      | <p>Male: <math>24\text{h Estimated sodium (mg/day)} = 0.208 \times \text{Pr24hCr (mg/day)} \times [\text{spot Na (mmol/L)} / \text{spot Cr (mg/L)}]^{0.300} \times 23</math></p> <p><math>\text{Pr24hCr (mg/day)} = e^{6.916 - 0.007 \times \text{age (years)} - 0.002 \times \text{height (cm)} + 0.013 \times \text{weight (kg)}}</math></p> <p>Female: <math>24\text{h Estimated sodium (mg/day)} = 0.329 \times \text{Pr24hCr (mg/day)} \times [\text{spot Na (mmol/L)} / \text{spot Cr (mg/L)}]^{0.463} \times 23</math></p> <p><math>\text{Pr24hCr (mg/day)} = e^{7.210 - 0.013 \times \text{age (years)} - 0.002 \times \text{height (cm)} + 0.010 \times \text{weight (kg)}}</math></p> |

\*We used the overnight urine sample instead of the second morning urine sample in this study.

Pr24hCr, predicted 24-h urine creatinine excretion.

BMI, body mass index.
